# Supplementary material
Source: PubMed Central journal article supplement (PMC3158733)
Supplement: NIHMS312716-supplement-1.pdf [file NIHMS312716-supplement-1.pdf]

## **Supplemental Material**

**Supplemental Table 1:** Studies Selected for Analysis

**Supplemental Table 2.** Selected Studies by Type of Physical Activity

**Supplemental Figure 1:** Flow Chart of Study Selection

**Supplemental Table 1: Studies Selected for Analysis**

| Author (Year) | Study Name & Country                                          | Gender (M, W, C) | N                                    | Mean Baseline Age (SE) or Age Range | Baseline Health Status | Mean Years of Follow-up Time | Physical Activity Type | CHD Outcome | Results RR (95% CI) P for Linear Trend                                                                                                                                                                                                        | Adjusted For:                                                 |
|---------------|---------------------------------------------------------------|------------------|--------------------------------------|-------------------------------------|------------------------|------------------------------|------------------------|-------------|-----------------------------------------------------------------------------------------------------------------------------------------------------------------------------------------------------------------------------------------------|---------------------------------------------------------------|
| Eaton (1995)  | The Israeli Ischemic Heart Disease study<br><br>Israel        | M                | 8,463                                | 40+                                 | Healthy                | 21                           | LTPA<br><br>Occ. PA    | Mortality   | LTPA<br>Sedentary: 1.00<br>Light: 0.79 (0.63,0.99)<br>Light Daily: 0.73 (0.59,0.89)<br>Heavy: 0.71 (0.52,0.98)<br><br>Occ. PA<br>Sitting: 1.00<br>Standing: 0.99 (0.75,1.18)<br>Walking: 0.94 (0.78,1.12)<br>Physical labor: 0.87 (0.67,1.10) | Age                                                           |
| Qvist (1996)  | Swedish level of Living Survey<br><br>Sweden                  | C                | 5,306<br><br>2546 M<br><br>2760 F    | 45-74                               | Healthy                | 10                           | LTPA                   | Mortality   | LTPA - M<br>Inactive: 1.26 (0.9,1.8)<br>Active: 1.00<br><br>LTPA - F<br>Inactive: 1.35 (0.8,2.2)<br>Active: 1.00                                                                                                                              | Age, BP, weight index, smoking                                |
| Folsom (1997) | Atherosclerosis Risk in Communities (ARIC)<br><br>USA & Italy | C                | 14,040<br><br>6,188 F<br><br>7,852 M | 45-64                               | Healthy                | 4-7                          | LTPA                   | Incidence   | LTPA - M<br>Q1: 1.00<br>Q2: 0.96 (0.67,1.37)<br>Q3: 0.70 (0.44,1.13)<br>Q4: 0.76 (0.51,1.13)<br>P: 0.08<br><br>LTPA - F<br>Q1: 1.00<br>Q2: 0.74 (0.43,1.27)<br>Q3: 0.85 (0.44,1.64)<br>Q4: 0.56 90.30,1.06)<br>P: 0.12                        | Age, education, smoking, alcohol, HRT, race, and field-center |

|                  |                                                |   |         |                     |         |    |                             |           |                                                                                                                                                                                                                                                                                                   |                                                                                 |
|------------------|------------------------------------------------|---|---------|---------------------|---------|----|-----------------------------|-----------|---------------------------------------------------------------------------------------------------------------------------------------------------------------------------------------------------------------------------------------------------------------------------------------------------|---------------------------------------------------------------------------------|
| Rosengren (1997) | Multifactor Primary Prevention Study<br>Sweden | M | 7,142   | 47-55               | Healthy | 20 | LTPA<br>Occ. PA             | Mortality | LTPA<br>Mainly sedentary: 1.00<br>Moderate: 0.84 (0.71,1.00)<br>Regular Exercise / Athletic Sports: 0.84 (0.73,0.96)<br><br>Occ. PA<br>Sedentary: 1.00<br>Very stren. work: 0.83 (0.62,1.12)                                                                                                      | Age, smoking, BP, cholesterol, BMI, diabetes, alcohol abuse, occupational class |
| Leon (1997)      | MRFIT<br>USA                                   | M | 12,138  | 35-57               | Healthy | 16 | LTPA                        | Mortality | LTPA<br>D1: 1.00<br>D2-4: 0.75 (0.54,0.96)<br>5-7: 0.81 (0.64,1.04)<br>D8-10: 0.75 (0.59,0.96)                                                                                                                                                                                                    | Age, intervention group, education, smoking, cholesterol, BP, BMI               |
| Weller (1998)    | Canada Fitness Survey Cohort<br>Canada         | W | 6,620   | 50 (15)<br>30+      | Healthy | 7  | LTPA<br>Walking<br>Non-LTPA | Mortality | LTPA<br>Q1: 1.00<br>Q2: 0.61 (0.07,1.19)<br>Q3: 0.84 (0.52,1.37)<br>Q4: 0.63 (0.36,1.09)<br><br>Walking<br><½ the time: 1.00<br>½ the time: 0.67 (0.40,1.11)<br>>½ the time: 0.78 (0.43,1.39)<br><br>Non-LTPA<br>Q1: 1.00<br>Q2: 0.71 (0.44,1.16)<br>Q3: 0.57 (0.33,0.97)<br>Q4: 0.49 (0.26,0.92) | Age                                                                             |
| Bijnen (1998)    | Zutphen Study<br>Dutch                         | M | 802     | 71.4 (5.2)<br>64-84 | Healthy | 10 | Total PA                    | Mortality | Total PA<br>T1: 1.00<br>T2: 0.87 (0.52,1.45)<br>T3: 1.01 (0.60,1.71)<br>P: 0.99                                                                                                                                                                                                                   | Age, major chronic diseases, smoking, alcohol                                   |
| Chen (1999)      | National Population Health Survey<br>Canada    | C | 7,158   | 20+                 | Healthy | 2  | LTPA                        | Incidence | LTPA<br>Sedentary: 5.0 (1.84,13.59)<br>Light: 3.7 (1.26,10.67)<br>Moderate: 1.0<br>Active: 1.3 (0.41,3.89)                                                                                                                                                                                        | "A number of possible confounding factors"                                      |
| Manson (1999)    | Nurse's Health Study<br>USA                    | W | 72, 488 | 40-65               | Healthy | 8  | LTPA<br>Walking             | Incidence | LTPA (MET-hrs/wk)<br>Q1 (0-2.0): 1.00<br>Q2 (2.1-4.6): 0.85 (0.69,1.06)<br>Q3 (4.7-10.4): 0.78 (0.62,0.99)                                                                                                                                                                                        | Age, smoking, menopausal status, parental history of MI, vitamin                |

|                    |                                                   |   |        |               |         |      |           |           |                                                                                                                                                                                                                                                                                                                                                                                                                                   |                                                                                                             |
|--------------------|---------------------------------------------------|---|--------|---------------|---------|------|-----------|-----------|-----------------------------------------------------------------------------------------------------------------------------------------------------------------------------------------------------------------------------------------------------------------------------------------------------------------------------------------------------------------------------------------------------------------------------------|-------------------------------------------------------------------------------------------------------------|
|                    |                                                   |   |        |               |         |      | Walk Pace |           | <p>Q4 (10.5-21.7): 0.69 (0.54,0.88)<br/> Q5 (&gt;21.7): 0.60 (0.46,.0.77)<br/> P &lt;0.001</p> <p>Walking (hrs/wk)<br/> Q1 (≤0.5): 1.00<br/> Q2 (0.6-2.0): 0.78 (0.57,1.06)<br/> Q3 (2.1-3.8): 0.88 (0.65,1.21)<br/> Q4 (3.9-9.9): 0.70 (0.51,0.95)<br/> Q5 (≥10): 0.65 (0.47,0.91)<br/> P: 0.02</p> <p>Walk Pace (mph)<br/> Easy (&lt;2): 1.00<br/> Average (2-2.9): 0.75 (0.6,0.95)<br/> (Very) Brisk (3+): 0.64 (0.45,0.9)</p> | supplement use,<br>alcohol, aspirin                                                                         |
| Hakim (1999)       | Honolulu Heart Study<br><br>USA                   | M | 2,678  | 71-93         | Healthy | 2-4  | Walking   | Incidence | <p>Walking (miles/day)<br/> &lt;0.25: 2.3 (1.3,4.1)<br/> 0.25-1.25: 2.1 (1.2,3.6)<br/> &gt;1.5: 1.00<br/> P: 0.002</p>                                                                                                                                                                                                                                                                                                            | Age, total cholesterol, HDL, hypertension, diabetes, alcohol, physical function score, years lived in Japan |
| Kaprio (2000)      | Finnish Twin Cohort<br><br>Finland                | M | 8,205  | 25-69         | Healthy | 18   | LTPA      | Incidence | <p>LTPA (MET-hrs/day)<br/> Sedentary (0.54): 1.00<br/> Occasional Exercisers (2.32): 0.84 (0.70,1.01)<br/> Conditioning Exercisers (7.57): 0.68 (0.50,0.92)<br/> P: 0.01</p>                                                                                                                                                                                                                                                      | Age, BMI, smoking, hypertension, and diabetes                                                               |
| Wannamethee (2000) | British Regional Heart Study<br><br>Great Britain | M | 5,159  | 40-59         | Healthy | 16.8 | LTPA      | Incidence | <p>LTPA<br/> Inactive: 1.00<br/> Occasional: 0.68 (0.52,0.89)<br/> Light: 0.76 (0.58,0.99)<br/> Moderate: 0.46 (0.33,0.64)<br/> Mod. Vig./Vig.: 0.82 (0.61,1.09)</p>                                                                                                                                                                                                                                                              | Age, smoking, alcohol, social class, BMI, preexisting CHD                                                   |
| Sesso (2000)       | Harvard Alumni Health Study<br><br>USA            | M | 12,156 | 57.7<br>39-88 | Healthy | 17   | LTPA      | Incidence | <p>LTPA (kJ/wk)<br/> &lt;2,100: 1.00<br/> 2,100-4,199: 0.90 (.79,1.03)<br/> 4,200-8,399: 0.81 (.71,.92)<br/> 8,400-12,599: 0.80 (.69,.93)<br/> ≥12,600: 0.81 (.71,.94)<br/> P: 0.003</p>                                                                                                                                                                                                                                          | Age, BMI, alcohol, hypertension, diabetes, smoking, early parental death before age of 65                   |
| Haapanen-          | Northeast                                         | C | 6,787  | 35-63         | Healthy | 16   | LTPA      | Mortality | LTPA - M: (kcal/wk)                                                                                                                                                                                                                                                                                                                                                                                                               | Age, employment                                                                                             |

|                  |                                                     |   |                           |               |         |    |                      |           |                                                                                                                                                                                                                                                                                        |                                                                                                               |
|------------------|-----------------------------------------------------|---|---------------------------|---------------|---------|----|----------------------|-----------|----------------------------------------------------------------------------------------------------------------------------------------------------------------------------------------------------------------------------------------------------------------------------------------|---------------------------------------------------------------------------------------------------------------|
| Niemi (2000)     | Finland<br>Finland                                  |   | 1090 M<br>1122 F          |               |         |    |                      |           | 0-1,000: 1.70 (0.90,3.21)<br>1,001-1,900: .88 (0.44,1.76)<br>>1,900: 1.00<br>P: 0.056<br><br>LTPA - F: (kcal/wk)<br>0-800: 1.17 (0.51,2.68)<br>801-1,500: 0.43 (0.16,1.16)<br>>1,500: 1.00<br>P: 0.046                                                                                 | status, marital status, perceived health status, smoking and alcohol                                          |
| Lee (2001)       | Women's Health Study<br>USA                         | W | 39,372                    | 54 (7)<br>45+ | Healthy | 5  | Walk pace            | Incidence | Walk pace (km/hr)<br>DNW: 1.00<br><3.2: 0.56 (0.32,0.97)<br>3.2-4.7: 0.71 (0.47,1.05)<br>≥4.8: 0.52 (0.30,0.90)<br>P: 0.02                                                                                                                                                             | Age, smoking, alcohol, saturated fat, fiber, fruits and vegetables, menopausal status, HRT, MI history        |
| Batty (2001)     | Whitehall Study<br>United Kingdom                   | M | 11,633                    | 51<br>40-64   | Healthy | 25 | Trans. PA            | Mortality | Trans. PA (min/day)<br>0: 1.10 (1.0, 1.3)<br>10-19: 1.06 (1.0, 1.2)<br>20+: 1.00                                                                                                                                                                                                       | Age, employment, SBP, smoking, BMI, glucose intolerance, diabetes, FEV1                                       |
| Batty (2002)     | Whitehall Study<br>United Kingdom                   | M | 6,408<br>Healthy:<br>6056 | 40-64         | Healthy | 25 | LTPA<br>Walk Pace    | Mortality | LTPA<br>Inactive: 1.05 (0.9,1.3)<br>Moderately Active: 0.92 (0.8,1.1)<br>Active: 1.00<br><br>Walk Pace<br>Slower: 1.86 (1.4,2.4)<br>Same: 1.4 (1.2,1.6)<br>Faster: 1.00                                                                                                                | Age, grade, SBP, cholesterol, smoking, BMI, FEV1, disease at study entry                                      |
| Tanasescu (2002) | Health Professional's Follow-up Study (HPFS)<br>USA | M | 44,452                    | 40-75         | Healthy | 12 | Walking<br>Walk pace | Incidence | Walking (MET-hr/wk)<br>Q1 (0-1.19): 1.00<br>Q2 (1.20-3.49): 1.00 (0.83,1.21)<br>Q3 (3.50-6.00): 0.90 (0.74,1.10)<br>Q4 (7.00-14.74): 1.02 (0.84,1.23)<br>Q5 (≥14.75): 0.82 (0.67,1.00)<br>P: 0.04<br><br>Walk pace (mph)<br><2: 1.00<br>2-3: 0.74 (0.60,0.91)<br>3-4: 0.60 (0.45,0.79) | Age, alcohol, smoking, family history of MI, nutrient intake<br><br>*Plus diabetes, cholesterol, hypertension |

|                  |                                                                    |   |                                |             |         |      |                       |           |                                                                                                                                                                                                                                                                                                                                                                                       |                                                                       |
|------------------|--------------------------------------------------------------------|---|--------------------------------|-------------|---------|------|-----------------------|-----------|---------------------------------------------------------------------------------------------------------------------------------------------------------------------------------------------------------------------------------------------------------------------------------------------------------------------------------------------------------------------------------------|-----------------------------------------------------------------------|
|                  |                                                                    |   |                                |             |         |      |                       |           | ≥4: 0.50 (0.30,0.83)                                                                                                                                                                                                                                                                                                                                                                  |                                                                       |
| Manson (2002)    | Women Health's Initiative Observational Study<br><br>USA           | W | 73,743                         | 63<br>50-79 | Healthy | 3.2  | LTPA<br><br>Walking   | Incidence | LTPA (MET-hr/wk)<br>Q1 (0-2.4): 1.00<br>Q2 (2.6-7.2): 0.73 (0.53,0.99)<br>Q3 (7.3-13.4): 0.69 (0.51,0.95)<br>Q4 (13.5-23.3): 0.68 (0.50,0.93)<br>Q5 (≥23.3): 0.47 (0.33,0.67)<br>P <0.001<br><br>Walking (MET-hr/wk)<br>Q1 (0): 1.00<br>Q2 (0.1-2.5): 0.71 (0.53,0.96)<br>Q3 (2.6-5.0): 0.60 (0.44,0.83)<br>Q4 (5.1-10.0): 0.54 (0.39,0.76)<br>Q5 (>10): 0.61 (0.44,0.84)<br>P: 0.004 | Age                                                                   |
| Wagner (2002)    | PRIME Study<br><br>Ireland/France                                  | M | 9,758                          | 50-59       | Healthy | 5    | LTPA<br><br>Trans. PA | Incidence | LTPA<br>Lowest: 1.00<br>Middle: 0.73 (0.51,1.05)<br>Highest: 0.66 (0.46,0.96)<br><br>Trans. PA<br>No: 1.00<br>Yes: 1.19 (0.87,1.62)                                                                                                                                                                                                                                                   | Unadjusted                                                            |
| Yu (2003)        | Caerphilly Collaborative Heart Disease Study<br><br>United Kingdom | M | 1975                           | 49-64       | Healthy | 10.5 | LTPA                  | Mortality | LTPA (kcal/wk)<br>0-1,133: 1.00<br>1,134-2,769: 0.74 (0.44,1.25)<br>2,770-19,230: 0.55 (0.31,0.98)<br>P: 0.039                                                                                                                                                                                                                                                                        | Age, BP, BMI, smoking, class, family history of CHD, diabetes, job PA |
| Hillsdon (2004)  | OXCHECK trial<br><br>UK                                            | C | 10,522                         | 35-64       | Healthy | 12   | LTPA                  | Mortality | LTPA<br>Never/<1/month: 1.00<br><2 times/week: 0.46 (0.19,1.12)<br>≥2 times/week: 0.96 (0.53,1.75)                                                                                                                                                                                                                                                                                    | Age, sex, smoking, alcohol, pre-existing disease, social class        |
| Knoops (2004)    | HALE Project<br><br>11 European Countries                          | C | Men:<br>1507<br>Women<br>: 832 | 70-90       | Healthy | 10   | LTPA                  | Mortality | LTPA<br>Low: 1.00<br>High: 0.72 (0.48,1.07)                                                                                                                                                                                                                                                                                                                                           | Age, gender, education, BMI, study, dietary and lifestyle factors     |
| Sundquist (2005) | Swedish Annual Level-of-Living Survey                              | C | 5,196<br><br>2,645 M           | 35-74       | Healthy | 11   | LTPA                  | Incidence | LTPA<br>1 (none): 1.00<br>2 (occasionally): 0.74 (0.53,1.03)                                                                                                                                                                                                                                                                                                                          | Age, sex, income, smoking                                             |

|                  |                                       |   |                             |       |         |      |                              |           |                                                                                                                                                                                                                                                                                                                                                                                                                                                  |                                                                                                                      |
|------------------|---------------------------------------|---|-----------------------------|-------|---------|------|------------------------------|-----------|--------------------------------------------------------------------------------------------------------------------------------------------------------------------------------------------------------------------------------------------------------------------------------------------------------------------------------------------------------------------------------------------------------------------------------------------------|----------------------------------------------------------------------------------------------------------------------|
|                  | (SALLS)<br>Sweden                     |   | 2,551 F                     |       |         |      |                              |           | 3 (1-2/wk): 0.70 (0.50,0.97)<br>4 (2+/wk vig.): 0.52 (0.33,0.83)                                                                                                                                                                                                                                                                                                                                                                                 |                                                                                                                      |
| Chiuvè (2006)    | HPFS<br>USA                           | M | 42,847                      | 40-75 | Healthy | 16   | LTPA                         | Incidence | LTPA (hr/wk)<br>0: 1.22 (1.06,1.40)<br>0.1-1.5: 1.05 (0.90,1.24)<br>1.5-3.5: 1.08 (0.92,1.27)<br>3.5-6.0: 0.92 (0.76,1.11)<br>≥2 6.0: 1.00                                                                                                                                                                                                                                                                                                       | Age, family history of MI, aspirin use, antihypertensive meds, hypercholesterolemia, hypertension, lifestyle factors |
| Meisinger (2007) | MONICA Augsburg Studies<br>Germany    | C | 6,976<br>3,501 M<br>3,475 F | 45-74 | Healthy | 8.6  | LTPA                         | Incidence | LTPA – M: (per/wk)<br>0: 1.00<br><1: 1.02 (0.74,1.41)<br>1-2: 0.76 (0.54,1.07)<br>>2: 0.80 (0.57,1.13)<br><br>LTPA – F: (per/wk)<br>0: 1.00<br><1: 0.96 (0.54,1.71)<br>1-2: 0.45 (0.22,0.91)<br>>2: 0.18 (0.04,0.75)                                                                                                                                                                                                                             | Age, survey, diabetes, smoking, alcohol, family history of MI, education                                             |
| Hu (2007)        | Finnish Population Surveys<br>Finland | C | 47,840                      | 25-64 | Healthy | 18.9 | LTPA<br>Occ. PA<br>Trans. PA | Incidence | LTPA – M<br>Low: 1.00<br>Moderate: 0.93 (0.86, 1.00)<br>High: 0.73 (0.65,0.83)<br><br>LTPA – F<br>Low: 1.00<br>Moderate: 0.80 (0.72,0.89)<br>High: 0.64 (0.51,0.80)<br><br>Occ. PA - M<br>Low: 1.00<br>Moderate: 0.82 (0.74,0.91)<br>High: 0.87 (0.81,0.95)<br><br>Occ. PA - F<br>Low: 1.00<br>Moderate: 0.67 (0.59,0.77)<br>High: 0.77 (0.68,0.87)<br><br>Trans. PA – M (min/day)<br>0: 1.00<br>1-29: 0.92 (0.85,1.00)<br>30+: 0.91 (0.83,1.00) | Age, study year, education, alcohol, smoking                                                                         |

|                  |                                          |   |        |               |         |      |                       |           |                                                                                                                                                                                                                                                                                   |                                                                                                                                           |
|------------------|------------------------------------------|---|--------|---------------|---------|------|-----------------------|-----------|-----------------------------------------------------------------------------------------------------------------------------------------------------------------------------------------------------------------------------------------------------------------------------------|-------------------------------------------------------------------------------------------------------------------------------------------|
|                  |                                          |   |        |               |         |      |                       |           | Trans. PA – F (min/day)<br>0: 1.00<br>1-29: 0.83 (0.73,0.94)<br>30+: 0.66 (0.58,0.76)                                                                                                                                                                                             |                                                                                                                                           |
| Akesson (2007)   | Swedish Mammography Cohort<br><br>Sweden | W | 24,444 | 59<br>49-83   | Healthy | 6.2  | LTPA<br><br>Trans. PA | Incidence | LTPA (hr/wk)<br><1: 1.41 (1.1, 1.47)<br>1+: 1.00<br><br>Trans. PA (min/day)<br><40: 1.15 (0.90,1.47)<br>40+: 1.00                                                                                                                                                                 | Age, education, family history of MI, cholesterol, hypertension, hormone therapy, aspirin, energy intake, alcohol, smoking, WHR, other PA |
| Smith (2007)     | Rancho Bernardo Study<br><br>USA         | C | 1,3217 | 50-90         | Healthy | 10   | Walking               | Mortality | Walking (miles/day)<br>Nonwalker: 1.00<br><1: 1.14 90.67,1.94)<br>1+: 1.29 (0.73,2.28)                                                                                                                                                                                            | Age, sex, smoking, BMI, alcohol, exercise, history of CHD, hypertension, triglycerides, HDL                                               |
| Virkkunen (2007) | Helsinki Heart Study<br><br>Finland      | M | 1288   | 40-55         | Healthy | 8    | Occ. PA               | Incidence | Occ. PA<br>No: 1.00<br>Yes: 0.89 (0.53,1.51)                                                                                                                                                                                                                                      | Age, smoking, day-shift work                                                                                                              |
| Weinstein (2008) | Women's Health Study<br><br>USA          | W | 38,987 | 54 (7)<br>45+ | Healthy | 10.9 | LTPA<br><br>Walking   | Incidence | LTPA (kcal/wk)<br>0-199: 1.00<br>200-599: 0.88 (0.73,1.06)<br>600-1499: 0.78 (0.64,0.94)<br>1500+: 0.78 (0.63,0.97)<br>P: 0.007<br><br>Walking (hours/wk)<br>No walking: 1.00<br><1: 0.82 (0.67,1.00)<br>1-1.5: 0.70 (0.56,0.88)<br>2-3: 0.77 (0.60,0.97)<br>4+: 0.65 (0.51,0.83) | Age, treatment, parental history of MI, alcohol, smoking, hormone therapy, dietary factors                                                |
| Inoue (2008)     | JPHC Study<br><br>Japan                  | C | 83,034 | 45-74         | Healthy | 8.7  | LTPA                  | Mortality | LTPA – M<br>Q1: 1.00<br>Q2: 0.84 (0.64,1.11)<br>Q3: 0.68 (0.50,0.92)<br>Q4: 0.72 (0.54,0.96)<br>P: 0.015                                                                                                                                                                          | Age, area, occupation, history of diabetes, smoking, alcohol, BMI, energy intake, leisure sports/exercise                                 |



|                    |                                                  |   |                            |     |         |    |      |           |                                                                                                                                                                                      |                                                                          |
|--------------------|--------------------------------------------------|---|----------------------------|-----|---------|----|------|-----------|--------------------------------------------------------------------------------------------------------------------------------------------------------------------------------------|--------------------------------------------------------------------------|
|                    |                                                  |   |                            |     |         |    |      |           | LTPA – F<br>Q1: 1.00<br>Q2: 0.71 (0.46,1.08)<br>Q3: 0.55 (0.34,0.89)<br>Q4: 0.69 (0.41,1.17)<br>P: 0.035                                                                             |                                                                          |
| Pedersen<br>(2008) | Copenhagen<br>City Heart<br>Study<br><br>Denmark | C | 11,914<br>5272 M<br>6642 F | 20+ | Healthy | 20 | LTPA | Mortality | LTPA – M<br>Inactive: 1.00<br>Low: 0.67 (0.54,0.82)<br>Moderate/High: 0.71 (0.58,0.87)<br><br>LTPA – F<br>Inactive: 1.00<br>Low: 0.76 (0.61,0.94)<br>Moderate/High: 0.72 (0.56,0.92) | Age, smoking, BMI,<br>education, marital<br>status, diabetes,<br>alcohol |

### Table Key

|           |                                                                       |
|-----------|-----------------------------------------------------------------------|
| M; W; C   | Men; Women; Combined or both genders                                  |
| LTPA      | Leisure-time physical activity                                        |
| Vig. PA   | Vigorous intensity physical activity                                  |
| Walking   | Time spent walking per week                                           |
| Walk Pace | Usual pace of walking                                                 |
| Occ. PA   | Occupational physical activity                                        |
| Trans. PA | Transport physical activity                                           |
| Total PA  | Total physical activity; includes two or more physical activity types |
| Non-LTPA  | Physical activities outside of the 'leisure' type                     |
| Healthy   | Participants free of coronary heart disease at baseline               |
| Mortality | Restricted to fatal cases of CHD only                                 |
| Incidence | Inclusive of both fatal and non-fatal cases of CHD                    |
| Q; T; D   | Quartile/Quintile; Tertile; Decile                                    |
| BP        | Blood pressure                                                        |
| HRT       | Hormone therapy                                                       |
| BMI       | Body Mass Index                                                       |
| FEV1      | Forced expiratory volume in 1 minute                                  |
| HDL; LDL  | High density lipoprotein; Low density lipoprotein                     |

**Supplemental Table 2.** Selected Studies by Type of Physical Activity

| Physical Activity Type | Total No. of Studies (M, W, C)                                                     | No. of Quantitative Studies (M, W, C) |
|------------------------|------------------------------------------------------------------------------------|---------------------------------------|
| LT PA                  | 26 (15, 11, 5)                                                                     | 9 (5, 5, 0)                           |
| Walk time              | 7 (2, 4, 1)                                                                        | 5 (2, 3, 0)                           |
| Walk pace              | 3 (2, 1, 0)                                                                        | 2 (1, 1, 0)                           |
| Occupational PA        | 4 (3, 1, 1)                                                                        | 0                                     |
| Transport PA           | 4 (3, 2, 0)                                                                        | 0                                     |
| Total PA               | 3 (2, 2, 0)                                                                        | 0                                     |
| Non-Leisure PA         | 1 (0, 1, 0)                                                                        | 0                                     |
| <b>Total*</b>          | <b>33 (21, 13, 6)</b>                                                              | <b>12 (7, 6, 0)</b>                   |
| Total studies          | Studies with both qualitative and quantitative categorization of physical activity |                                       |
| Quantitative Studies   | Only studies with quantitative categorization of physical activity                 |                                       |
|                        | M=Men; W=Women; C=Combined genders                                                 |                                       |

\* These 33 total studies included 56 total physical activity-type-specific comparisons; many studies included comparisons from multiple physical activity types (e.g., LTPA, walking time, and vigorous PA assessed in the same study), and/or both genders.

**Supplemental Figure 1: Flow Chart of Study Selection**

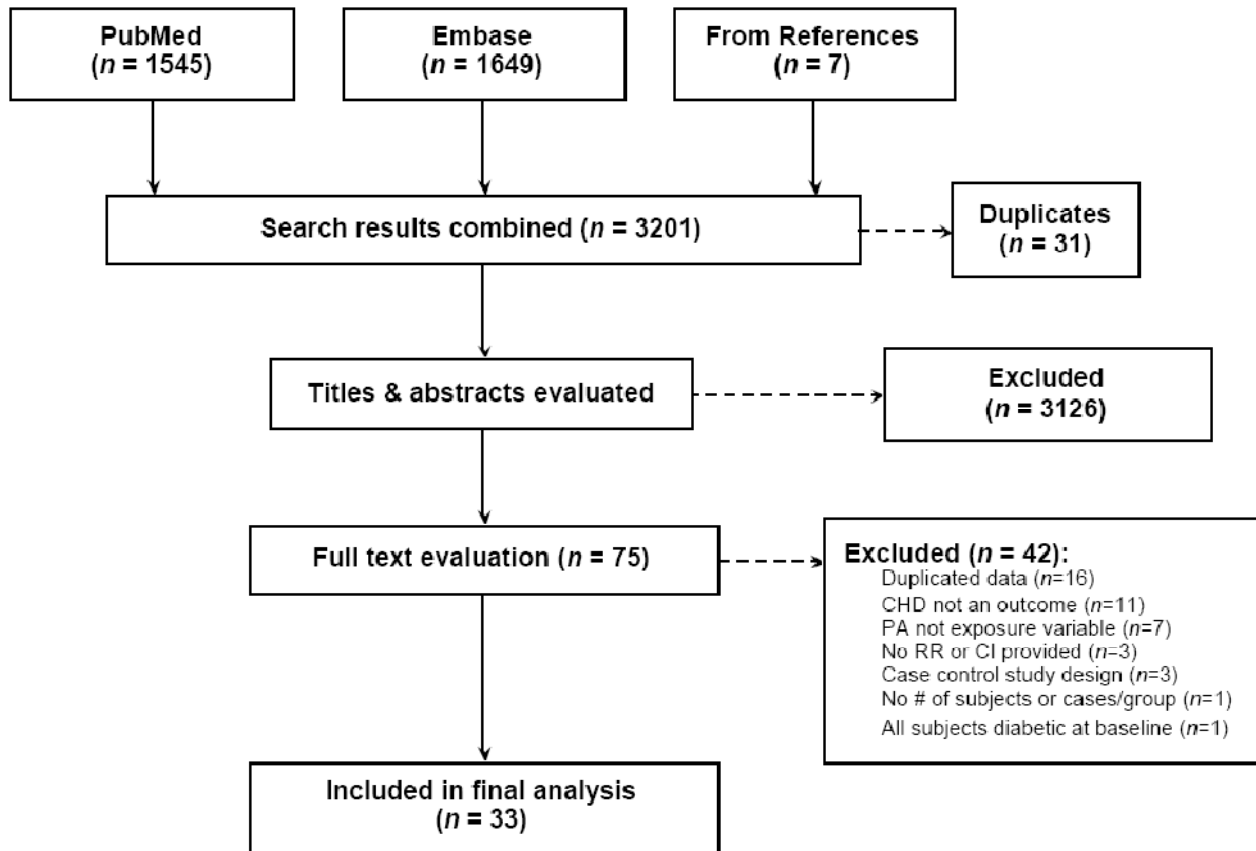

## Supplemental References

1. Eaton CB, Medalie JH, Flocke SA, Zyzanski SJ, Yaari S, Goldbourt U. Self-reported physical activity predicts long-term coronary heart disease and all-cause mortalities. Twenty-one-year follow-up of the Israeli Ischemic Heart Disease Study. *Arch Fam Med.* 1995; 4:323-329.
2. Qvist J, Johansson SE, Johansson LM. Multivariate analyses of mortality from coronary heart disease due to biological and behavioural factors. *Scand J Soc Med.* 1996; 24:67-76.
3. Folsom AR, Arnett DK, Hutchinson RG, Liao F, Clegg LX, Cooper LS. Physical activity and incidence of coronary heart disease in middle-aged women and men. *Med Sci Sports Exerc.* 1997; 29:901-909.
4. Rosengren A, Wilhelmsen L. Physical activity protects against coronary death and deaths from all causes in middle-aged men. Evidence from a 20-year follow-up of the primary prevention study in Goteborg. *Ann Epidemiol.* 1997; 7:69-75.
5. Leon AS, Myers MJ, Connett J. Leisure time physical activity and the 16-year risks of mortality from coronary heart disease and all-causes in the Multiple Risk Factor Intervention Trial (MRFIT). *Int J Sports Med.* 1997; 18:S208-215.
6. Weller I, Corey P. The Impact of Excluding Non-Leisure Energy Expenditure on the Relation between Physical Activity and Mortality in Women. *Epidemiology.* 1998; 9:632-635.

7. Bijnen FC, Caspersen CJ, Feskens EJ, Saris WH, Mosterd WL, Kromhout D. Physical activity and 10-year mortality from cardiovascular diseases and all causes: The Zutphen Elderly Study. *Arch Intern Med.* 1998; 158:1499-1505.
8. Chen J, Millar WJ. Health effects of physical activity. *Health Rep.* 1999; 11:21-30.
9. Manson JE, Hu FB, Rich-Edwards JW, Colditz GA, Stampfer MJ, Willett WC, Speizer FE, Hennekens CH. A prospective study of walking as compared with vigorous exercise in the prevention of coronary heart disease in women. *N Engl J Med.* 1999; 341:650-658.
10. Hakim AA, Curb JD, Petrovitch H, Rodriguez BL, Yano K, Ross GW, White LR, Abbott RD. Effects of walking on coronary heart disease in elderly men: the Honolulu Heart Program. *Circulation.* 1999; 100:9-13.
11. Kaprio J, Kujala UM, Koskenvuo M, Sarna S. Physical activity and other risk factors in male twin-pairs discordant for coronary heart disease. *Atherosclerosis.* 2000; 150:193-200.
12. Wannamethee SG, Shaper AG, Alberti KG. Physical activity, metabolic factors, and the incidence of coronary heart disease and type 2 diabetes. *Arch Intern Med.* 2000; 160:2108-2116.
13. Sesso HD, Paffenbarger R.S, Jr., Lee IM. Physical activity and coronary heart disease in men: The Harvard Alumni Health Study. *Circulation.* 2000; 102:975-980.

14. Haapanen-Niemi N, Miilunpalo S, Pasanen M, Vuori I, Oja P, Malmberg J. Body mass index, physical inactivity and low level of physical fitness as determinants of all-cause and cardiovascular disease mortality--16 y follow-up of middle-aged and elderly men and women. *Int J Obes Relat Metab Disord.* 2000; 24:1465-1474.
15. Lee IM, Rexrode KM, Cook NR, Manson JE, Buring JE. Physical activity and coronary heart disease in women: is "no pain, no gain" passe? *Jama.* 2001; 285:1447-1454.
16. Batty GD, Shipley MJ, Marmot M, Smith GD. Physical activity and cause-specific mortality in men: further evidence from the Whitehall study. *Eur J Epidemiol.* 2001; 17:863-869.
17. Batty GD, Shipley MJ, Marmot M, Smith GD. Physical activity and cause-specific mortality in men with Type 2 diabetes/impaired glucose tolerance: evidence from the Whitehall study. *Diabet Med.* 2002; 19:580-588.
18. Tanasescu M, Leitzmann MF, Rimm EB, Willett WC, Stampfer MJ, Hu FB. Exercise type and intensity in relation to coronary heart disease in men. *Jama.* 2002; 288:1994-2000.
19. Manson JE, Greenland P, LaCroix AZ, Stefanick ML, Mouton CP, Oberman A, Perri MG, Sheps DS, Pettinger MB, Siscovick DS. Walking compared with vigorous exercise for the prevention of cardiovascular events in women. *N Engl J Med.* 2002; 347:716-725.

20. Wagner A, Simon C, Evans A, Ferrieres J, Montaye M, Ducimetiere P, Arveiler D. Physical activity and coronary event incidence in Northern Ireland and France: the Prospective Epidemiological Study of Myocardial Infarction (PRIME). *Circulation*. 2002; 105:2247-2252.
21. Yu S, Yarnell JW, Sweetnam PM, Murray L. What level of physical activity protects against premature cardiovascular death? The Caerphilly study. *Heart*. 2003; 89:502-506.
22. Hillsdon M, Thorogood M, Murphy M, Jones L. Can a simple measure of vigorous physical activity predict future mortality? Results from the OXCHECK study. *Public Health Nutrition*. 2004; 7:557-562.
23. Knoop KT, de Groot LC, Kromhout D, Perrin AE, Moreiras-Varela O, Menotti A, van Staveren WA. Mediterranean diet, lifestyle factors, and 10-year mortality in elderly European men and women: the HALE project. *Jama*. 2004; 292:1433-1439.
24. Sundquist K, Qvist J, Johansson SE, Sundquist J. The long-term effect of physical activity on incidence of coronary heart disease: a 12-year follow-up study. *Prev Med*. 2005; 41:219-225.
25. Chiuve SE, McCullough ML, Sacks FM, Rimm EB. Healthy lifestyle factors in the primary prevention of coronary heart disease among men: Benefits among users and nonusers of lipid-lowering and antihypertensive medications. *Circulation*. 2006; 114:160-167.
26. Meisinger C, Lowel H, Heier M, Kandler U, Doring A. Association of sports activities in leisure time and incident myocardial infarction in middle-aged men and women from the general

population: The MONICA/KORA Augsburg cohort study. *European Journal of Cardiovascular Prevention and Rehabilitation*. 2007; 14:788-792.

27. Hu G, Jousilahti P, Borodulin K, Barengo NC, Lakka TA, Nissinen A, Tuomilehto J. Occupational, commuting and leisure-time physical activity in relation to coronary heart disease among middle-aged Finnish men and women. *Atherosclerosis*. 2007; 194:490-497.

28. Akesson A, Weismayer C, Newby PK, Wolk A. Combined effect of low-risk dietary and lifestyle behaviors in primary prevention of myocardial infarction in women. *Arch Intern Med*. 2007; 167:2122-2127.

29. Smith TC, Wingard DL, Smith B, Kritz-Silverstein D, Barrett-Connor E. Walking decreased risk of cardiovascular disease mortality in older adults with diabetes. *J Clin Epidemiol*. 2007; 60:309-317.

30. Virkkunen H, Harma M, Kauppinen T, Tenkanen L. Shift work, occupational noise and physical workload with ensuing development of blood pressure and their joint effect on the risk of coronary heart disease. *Scand J Work Environ Health*. 2007; 33:425-434.

31. Weinstein AR, Sesso HD, Lee IM, Rexrode KM, Cook NR, Manson JE, Buring JE, Gaziano JM. The joint effects of physical activity and body mass index on coronary heart disease risk in women. *Archives of Internal Medicine*. 2008; 168:884-890.



32. Inoue M, Iso H, Yamamoto S, Kurahashi N, Iwasaki M, Sasazuki S, Tsugane S. Daily total physical activity level and premature death in men and women: results from a large-scale population-based cohort study in Japan (JPHC study). *Ann Epidemiol.* 2008; 18:522-530.

33. Pedersen JO, Heitmann BL, Schnohr P, Gronbaek M. The combined influence of leisure-time physical activity and weekly alcohol intake on fatal ischaemic heart disease and all-cause mortality. *Eur Heart J.* 2008; 29:204-212.
